# Supplementary material for: Highly efficient photoanodes based on cascade structural semiconductors of Cu2Se/CdSe/TiO2: a multifaceted approach to achieving microstructural and compositional control
Source: Royal Society of Chemistry journal article supplement (doi:10.1039/c5ta09179a), 2016-01-01
Supplement: c5ta09179a1.pdf [file c5ta09179a1.pdf]

Electronic Supplementary Information

**Highly Efficient Photoanode Based on Cascade  
Structural Semiconductor of Cu<sub>2</sub>Se/CdSe/TiO<sub>2</sub>: A  
Multifaceted Approach to Achieving  
Microstructural and Compositional Controls**

Baohe Chong,<sup>abc</sup> Wen Zhu,<sup>\*abc</sup> Yong Liu,<sup>a</sup> Li Guan<sup>b</sup> and George Z. Chen<sup>\*b</sup>

<sup>a</sup> State Key Laboratory of Materials Processing and Die & Mould Technology, Huazhong University of Science & Technology, Wuhan 430074, People's Republic of China

<sup>b</sup> Department of Chemical and Environmental Engineering, The University of Nottingham, Nottingham NG7 2RD, United Kingdom

<sup>c</sup> Research Institute of Huazhong University of Science & Technology in Shenzhen, Shenzhen Virtual University Park, Shenzhen 518000, People's Republic of China

Email: [wenzhu@nottingham.ac.uk](mailto:wenzhu@nottingham.ac.uk) (W. Zhu), [George.Chen@nottingham.ac.uk](mailto:George.Chen@nottingham.ac.uk) (G.Z. Chen)

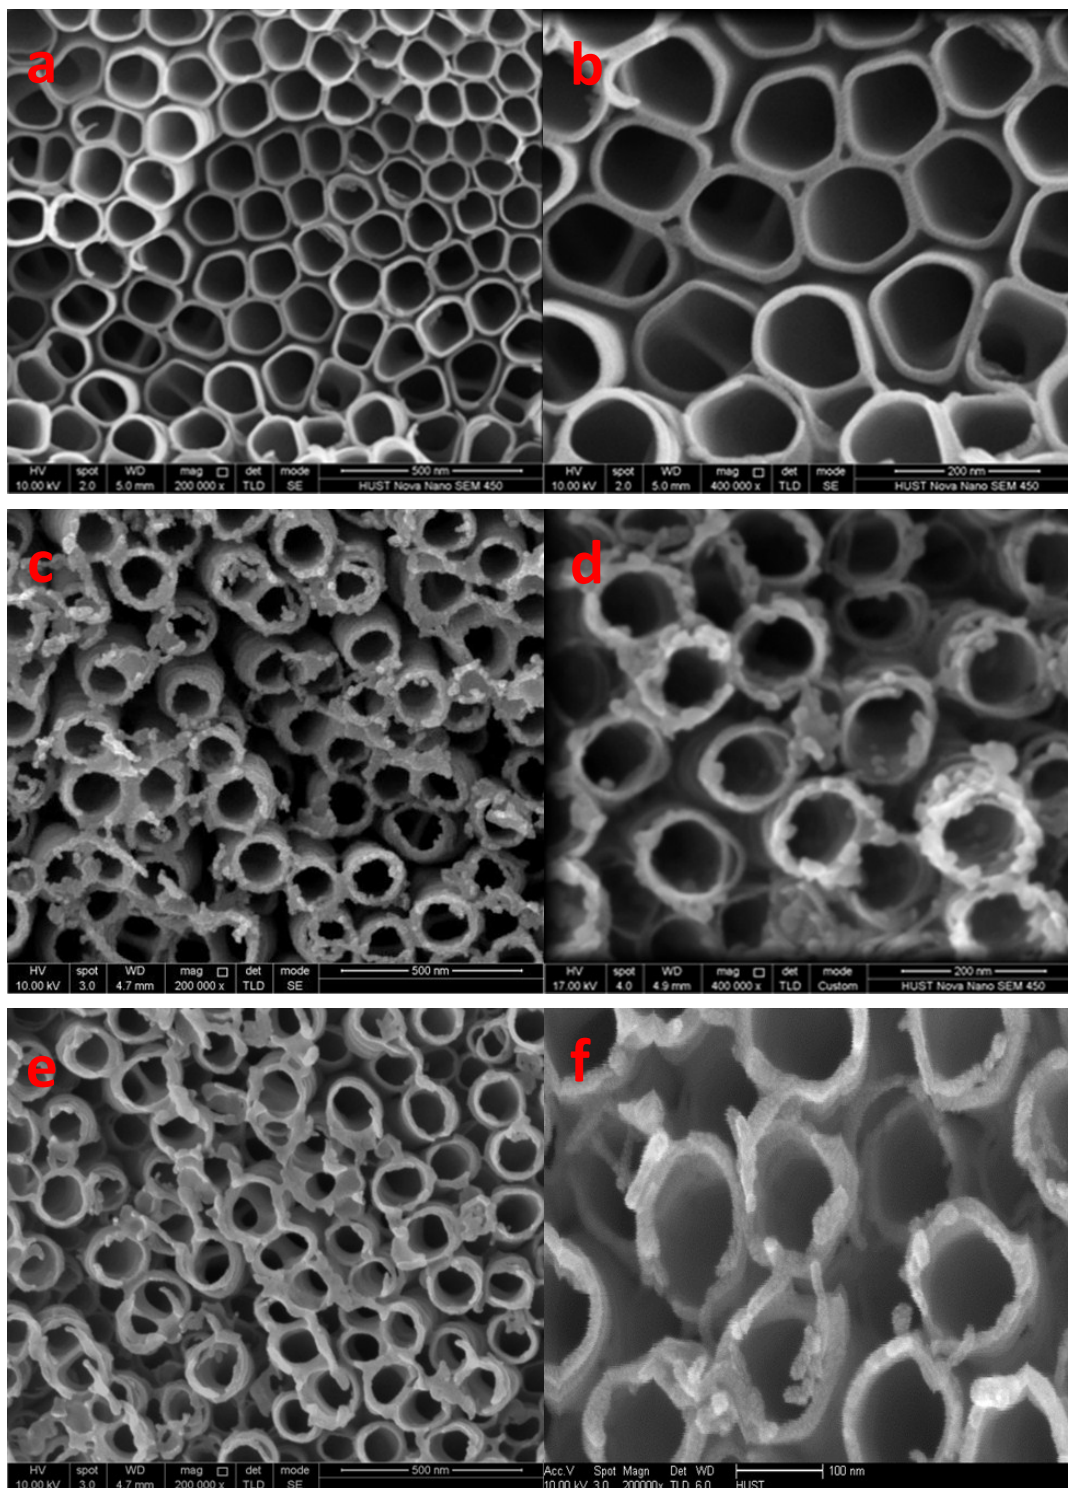

Figure S1. FESEM images of top-surface: (a,b) pure TiO<sub>2</sub>, (c,d) CdSe(7h)/TiO<sub>2</sub>, (e,f) CdSe(1h)/Cu(0.6C)/CdSe(6h)/TiO<sub>2</sub>

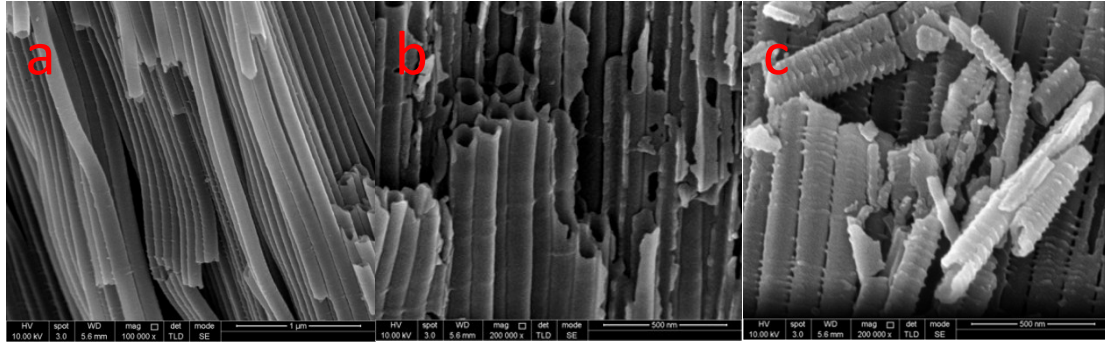

Figure S2. Cross-sectional FSEM images of pure TiO<sub>2</sub> (a), CdSe/TiO<sub>2</sub> (b) and CdSe(1h)/Cu(0.6C)/CdSe(6h)/TiO<sub>2</sub> (c).

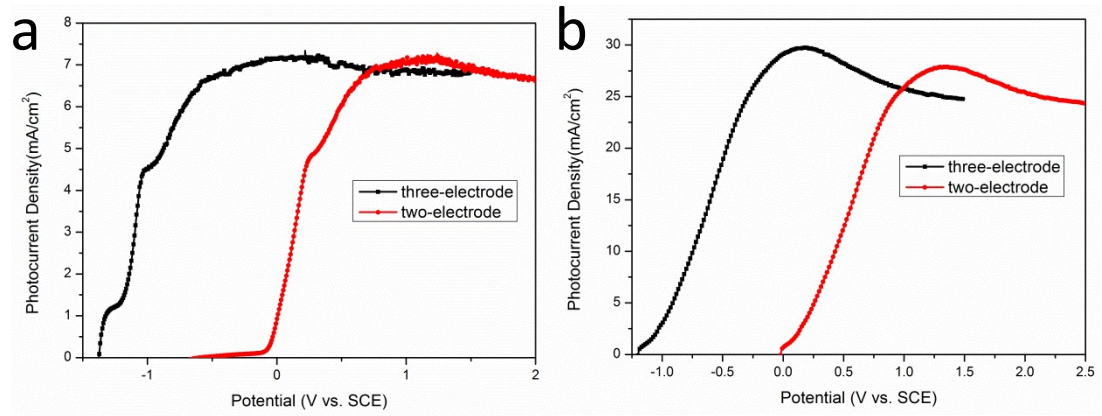

**Figure S3.** (a) Photocurrent density curves of CdSe/TiO<sub>2</sub> NTAs in different configuration, (b) Photocurrent density curves of Cu<sub>2</sub>Se/CdSe/TiO<sub>2</sub> NTAs in different configuration.
